# Supplementary material
Source: MDPI journal article supplement (https://www.mdpi.com/1999-4907/6/5/1666)
Supplement: s1 [file s1]

Supplementary Information

Table of Contents

| Supplementary Information 1—How to Read Mosaic Plots | S2 |
| --- | --- |
| Supplementary Information 2—Calculation of Ecosystem Service Indicators | S5 |
| Ecosystem Service: Biodiversity | S5 |
| Ecosystem Service: Carbon Sequestration | S10 |
| Ecosystem Service: Harvested Wood | S13 |
| Ecosystem Service: Recreation | S14 |
| Ecosystem Service: Standing Volume | S17 |
| Ecosystem Service: Tourism | S18 |
| Ecosystem Service: Quality Water Provision | S19 |
| Ecosystem Service: Water and Soil Protection | S21 |
| Ecosystem Service: Firesafety | S22 |
| Ecosystem Service: Hunting | S22 |
| Ecosystem Service: Landscape Aesthetics | S22 |
| Ecosystem Service: Mushroom Production | S23 |
| Ecosystem Service: Natural Dynamics Protection | S23 |
| Ecosystem Service: Reindeer Area | S23 |
| Ecosystem Service: Cork Production | S24 |
| Ecosystem Service: Pine Cone Production | S24 |
| Ecosystem Service: Other Protective Functions | S24 |
| Supplementary Information 3—Validation of Forest Growth Models | S25 |

Supplementary Information 1—How to Read Mosaic Plots

Mosaic plots are extensively used in the main text for visualizing consolidated scenario outcomes. As this highly useful diagram type is not as common as other means of visualizing categorical data,
we provide a short explanation of how to read them. With a focus on the ecosystem service
“Wood Production”, Figure S1 shows the outcomes of the scenario runs related to the variables “Social Environment” (rural or city near) and “Scenario Category” (“less intensive management”, “more
intensive management”, and “near business as usual”). While Figure S1a is based on the original data and therefore is the same as the middle panel of Figure 4 in the main text, Figure S1b,c show modified data in order to illustrate how mosaic diagrams display different data contents.


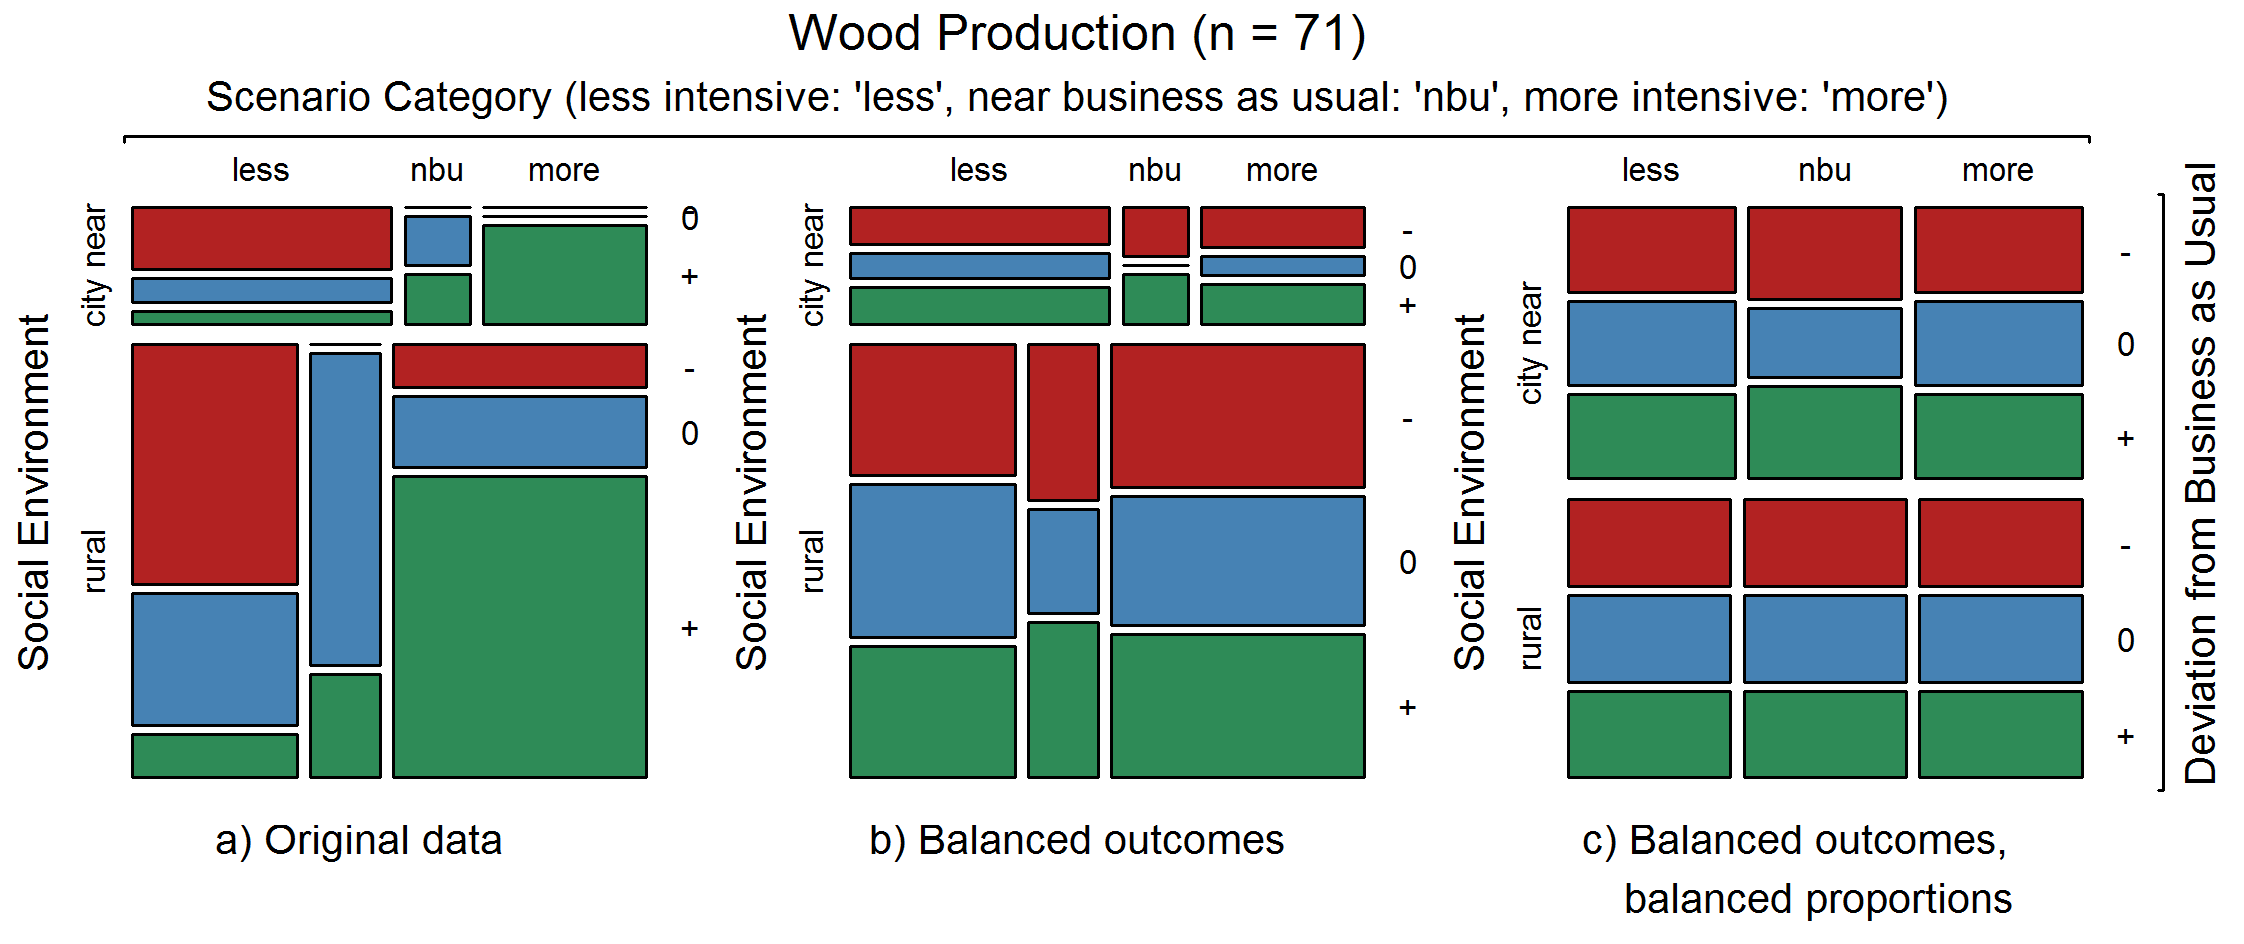


**Figure S1.** Demonstration of how different data constellations change the appearance of a mosaic plot (for corresponding numbers see Supplementary Tables 1–3). (a) Original data for scenario results with a focus on wood production related to social environment and scenario category (corresponding to Figure 4, middle panel). Deviation from business as usual: “−” (red), “0” (blue). “+” (green): decreased, unchanged, increased ecosystem service provision compared to business as usual. Scenario Category: Less intensive (“less”), more intensive treatment (“more”), and near business as usual (“nbu”). *Cf.* Supplementary
Table 1. (b) Mosaic plot that would result if all combinations of social environment and scenario category would be represented in the same way as in the original data, but without any trend concerning deviation from business as usual. *Cf.* Supplementary Table 2. (c) Mosaic plot that would result if there were not only no trend in the data but also no unequal representation of any variable combination.

A mosaic plot consists of colored tiles whose total area represents the total number of observations,
71 in our example. Each tile represents a variable combination (Social Environment, Scenario Category, and Deviation from Business as Usual), and its area is proportional to the number of observations that represent that variable combination. Supplementary Figure 1a corresponds with Supplementary Table 1. While there are only 15 observations reported for the “city near” social environment, there are 56 available for rural settings (Supplementary Table 1). Thus, the block of tiles representing rural social environments covers an area which is 56/15 ~ about 3.7 times greater than the one covered by the
“city near” block of tiles. In the same way, e.g., the tile representing a “+”-deviation from business as usual with more intensive management in rural environments (21 observations) is 21/5 ~ about 4 times greater than the correponding tile representing city near envitonments (“+”-deviation from business as usual with more intensive management, 5 observations). Thus, we can conclude from Supplementary Figure 1a that rural social environments are considerably better represented than city near ones, and that in both social environments near business as usual scenarios are the least represented ones. Moreover we see that (expectedly) in city near as well as in rural forest areas more intensive management leads in the overwhelming majority of the observations to a “+”-deviation from business as usual, suggesting that typically more intensive forest management increases wood production independently from the
social environment. *Vice versa*, “-”-deviations from business as usual almost exclusively occur in less intensive management scenarios.

**Table S1.** Original data. Observed frequencies of scenario outcomes (in terms of deviation from business as usual) by social environment and scenario category. Total *n* = 71. This table corresponds to Supplementary Figure 1a.

| **Scenario Category** | | | | |
| --- | --- | --- | --- | --- |
| **Social Environment** | **Deviation from Business as Usual** | **Less Intensive** | **Near Business As Usual** | **More Intensive** |
| city near | **-** | 5 | 0 | 0 |
|  | **0** | 2 | 1 | 0 |
|  | **+** | 1 | 1 | 5 |
| rural | **-** | 11 | 0 | 3 |
|  | **0** | 6 | 6 | 5 |
|  | **+** | 2 | 2 | 21 |

Supplementary Figure 1b (corresponding to Supplementary Table 2) shows the same frequencies as the original data on the level of combinations from “Social Environment” and “Scenario Category”. However, inside these combinations the numbers of observation have been adjusted to represent all types of “Deviation from Business as Usual” (“−”, “0”, “+”) as balanced as possible (Supplementary Table 2). Thus, Supplementary Figure 1b shows the case if there were no trend documented in our data.

If there is no trend in the data and each possible variable combination is equally represented,
Figure S1c, corresponding with Table S3, results. With other words, completely balanced observation numbers result in a mosaic diagram with equally-sized tiles.

More information about mosaic plots is given in Hartigan and Kleiner (1984), Friendly (1994), and Meyer *et al.* (2006) where the mosaic plot routines we used in this study are shown.

**Table S2.** Balanced outcomes. Adjusted frequencies of scenario outcomes (in terms of deviation from business as usual) by social environment and scenario category. For the variable combinations “Social Environment” with “Scenario Category” the overall sums of observations are the same as in the original data (Table S1.), however inside these combinations the numbers for “Deviation from Business as usual” have been adjusted in order to be as balanced as possible. This table corresponds to Figure S1b.

| **Scenario Category** | | | | |
| --- | --- | --- | --- | --- |
| **Social Environment** | **Deviation from Business as Usual** | **Less Intensive** | **Near Business as Usual** | **more Intensive** |
| city near | **-** | 3 | 1 | 2 |
|  | **0** | 2 | 0 | 1 |
|  | **+** | 3 | 1 | 2 |
| Rural | **-** | 6 | 3 | 10 |
|  | **0** | 7 | 2 | 9 |
|  | **+** | 6 | 3 | 10 |

**Table S3.** Balanced outcomes, balanced proportions. Adjusted frequencies of scenario outcomes (in terms of deviation from business as usual) by social environment and scenario category. The total number of observations (*n* = 71) is the same as in the original data
(Table S1), however the number of observations of each variable combination has been adjusted to be as balanced as possible. This results in an equal observation number of 4, with one exception (3). This table corresponds to Figure S1c.

| **Scenario Category** | | | | |
| --- | --- | --- | --- | --- |
| **Social Environment** | **Deviation from Business as Usual** | **Less Intensive** | **Near Business as Usual** | **More Intensive** |
| city near | **-** | 4 | 4 | 4 |
|  | **0** | 4 | 3 | 4 |
|  | **+** | 4 | 4 | 4 |
| rural | **-** | 4 | 4 | 4 |
|  | **0** | 4 | 4 | 4 |
|  | **+** | 4 | 4 | 4 |

References

1. Friendly, M. Mosaic displays for multi-way contingency tables. *J. Am. Stat. Assoc.* **1994**, *89*,
   190–200.
2. Hartigan, J.A.; Kleiner, B. A mosaic of television ratings. *Am. Stat.* **1984**, *38*, 32–35.
3. Meyer, D.; Zeileis, A.; Hornik, K. The strucplot framework: Visualizing multi-way contingency tables with vcd. *J. Stat. Softw.* **2006**, *17*, 1–48.

Supplementary Information 2—Calculation of Ecosystem Service Indicators

For the ecosystem services investigated in the paper, each country team used its own calculation methods. In this supplement we present the country-specific methods for each ecosystem service considered. The presentation is grouped by ecosystem services (the frequently reported ones following in alphabetical order: biodiversity, carbon sequestration, harvested wood, recreation, standing volume, tourism, quality
water provision, water and soil protection; the less frequently reported ones in the following order: firesafety, hunting, landscape aesthetics, mushroom production, natural dynamics protection, reindeer area, cork production, pine cone production, other protective functions; see Table of contents, p. S1). From the Portuguese case studies several ecosystem services (conifer sawlogs, cork oak fuelwood, eucalypt pulpwood, hardwood timber) were reported which can be considered as sub-categories of the service “harvested wood”. Similarly, coastal protection, sand dunes embankment, and watershed protection are presented together as “other protective functions” here. For each ecosystem service the methods are listed country-wise in alphabetical order (Bulgaria, France, Germany, Ireland, Italy, Lithuania, Netherlands, Portugal, Slovakia, Sweden).

Each description shows the central idea of the method in a very condensed way first (bullet point “Concept”. Especially if the method is not published so far, a more detailed description follows;
if references are available, they are also listed.

Ecosystem Service: Biodiversity

**Country:** Bulgaria

**Concept, Description, References:** See Slovakia

**Ecosystem Service:** Biodiversity

**Country:** France

**Concept:** Biodiversity is assumed to be connected to the amount of deadwood.

**Description:**

The biodiversity index used in the French case studies is a proxy of for saproxylic diversity and
the diversity of associated bird species. It is based on stand age and the number of years between subsequent thinnings, which affects the remaining dead wood volume. This indirect calculation was necessary as dead wood amounts cannot be directly provided by the model applied for Maritime pine.

References

1. Orazio, C.; Cordero, R.; Vallet, P.; Meredieu, C.; Jactel, H.; Hautdidier, B. New ecosystem services and risk indicators at landscape level for forests of the Landes of Gascony. **2015**, in press.

**Ecosystem Service:** Biodiversity

**Country:** Germany

**Concept:** Biodiversity is assumed to be connected to the tree species diversity, the habitat preferences of an umbrella bird species, and the amount of deadwood

**Description:**

The biodiversity index used in the German case studies was tailored for use on stand level with single-tree based forest simulators. It evaluates the forest structure information provided by such a model for three biodiversity components:

(1) Number of tree species

(2) Habitat suitability for the black woodpecker (*Dryocopus martius*), a widespread umbrella species for biodiversity conservation (Fleishman *et al.* 2001)

(3) Potential deadwood volume

For each of the three components an index value between 1 (very low biodiversity) and 5 (very high biodiversity) is determined. The overall biodiversity index is the weighted mean of the three individual component values (weights: tree species number—30%, woodpecker habitat suitability—40%, potential deadwood volume—30%).

Table S4 shows how the index values for the biodiversity components number of tree species and potential deadwood volume are found. While the number of tree species in a stand is an information which is readily available during the course of a growth simulation, the potential deadwood volume must be estimated. This estimate is based on two sources, namely (I) the volume of the trees that died due to natural mortality; and (II) the volume of the logging residues based on a single-tree grading algorithm. Both variables are cumulated over time but the stock of deadwood volume reduces by an assumed decay rate at the same time.

**Table S4.** Determining the resulting values (range 1–5) for the biodiversity index components “number of tree species” and “potential deadwood volume”.

| **Number of Tree Species** | **Potential Deadwood Volume (m³ ha−1)** | **Resulting Index Component** |
| --- | --- | --- |
| 1 | 0 < 2.5 | 1 |
| 2 | 2.5 < 7.5 | 2 |
| 4–5 | 7.5 < 15 | 3 |
| 6–8 | 15 < 30 | 4 |
| 9 and more | >30 | 5 |

Quantifying woodpecker habitat suitability needs a slightly more complex algorithm. We start with an index value of 1 (lowest possible habitat suitability). For each of the following four criteria, a value of 1 is added in case they are fulfilled:

(1) Medium stand density; it is used as a proxy for an optimum combination of sufficient flight space and stand closure. This is assumed to be given for stand density index (Reineke 1933) values of 500–700.

(2) The occurrence of Common Beech (*Fagus sylvatica* L.) which is the preferred tree species
for nesting.

(3) The occurrence of trees with a diameter in breast height >35 cm. Such trees are potential cavity trees for nesting.

(4) Stand height > 20 m. This criterion is used for expressing Black Woodpeckers’ disrelish for
pre-mature stands.

References

1. Cockle, K.L.; Martin, K.; Wesołowski, T. Woodpeckers, decay, and the future of cavity-nesting vertebrate communities worldwide. *Front. Ecol. Environ.* **2011**, *9*, 377–382.
2. Fleishman, E.; Blair, R.B.; Murphy, D.D. Empirical validation of a method for umbrella species selection. *Ecol. Appl.* **2001**, *11*, 1489–1501.
3. Reineke, L.H. Perfecting a stand-density index for even-aged forests. *J. Agric. Res.* **1933**, *46*,
   627–638.

**Ecosystem Service:** Biodiversity

**Country:** Ireland

**Concept:** Biodiversity is linked to habitat suitability for several key species and the species
richness potential.

**Description:**

The biodiversity indices used in the Irish case studies are based on habitat suitability and species
richness potential. Scales from 1 to 10 were used, where 10 is the most suitable habitat for a
specific indicator. The forest-related biodiversity indicators strongest underpinned by quantitative research data are nesting birds and ground vegetation (O’Halloran *et al.*, 2011; Smith *et al.*, 2005). The indices for deer forage and deer cover are the default values for PractiSFM, a multi-resource inventory protocol designed to assist Irish forest managers, developed by Barrett *et al.* (2007). A range of sources was used to assign the indices for red squirrel (Bryce and Macdonald, 2000; Carey and Hamilton, 2008; Carey *et al.*, 2007; Flaherty *et al.*, 2012; Huxley, 2003; Waters and Lawton, 2011) and Hen Harrier (Forest Service, 2012; Wilson *et al.*, 2006; Wilson *et al.*, 2010) to forest land.

References

1. Barrett, F.; Somers, M.J.; Nieuwenhuis, M. *PractiSFM—An Operational Multi-Resource Inventory Protocol for Sustainable Forest Management*; CABI: Wallingford, UK, 2007; pp. 224–237.
2. Bryce, J.M.; Macdonald, D.W. Projected changes in red squirrel habitats in Craigvinean Forest. *Scott. For.* **2000**, *54*, 87–90.
3. Carey, M.; Hamilton, G. *Securing Ireland’s Broadleaf Forests and Conservation of Native
   Red Squirrels Through Integrated Management of Grey Squirrels*; Department of Agriculture, Food the Marine: Dublin, Ireland, 2008.
4. Carey, M.; Hamilton, G.; Poole, A.; Lawton, C. *The Irish Squirrel Survey*; COFORD: Dublin,
   Ireland, 2007.
5. Flaherty, S.; Patenatue, G.; Close, A.; Lurz, P.W.W. The impact of forest stand structure on red squirrel habitat use. *Forestry* **2012**, *85*, 437–444.
6. Forest Service. *Forest Service Appropriate Assessment Procedure—Appendix B Appropriate Assessment Procedure (AAP) requirements regarding Hen Harrier SPAs and afforestation*; Department of Agriculture, Food the Marine: Dublin, Ireland, 2012.
7. Huxley, L. *The Grey Squirrel Review. Profile of an Invasive Alien Species. Grey Squirrel*
   (*Sciurus carolinensis*); European Squirrel Initiative: Dorset, UK, 2003.
8. O’Halloran, J.; Irwin, S.; Kelly, D.; Kelly, T.; Mitchell, F.; Coote, L.; Oxbrough, A.; Wilson, M.; Martin, R.; Moore, K.; *et al.* *Management of Biodiversity in a Range of Irish Forest Types*; Report prepared for the Department of Agriculture, Fisheries and Food; Cork, Ireland, 2011.
9. Smith, G.; O’Donoghue, S.; Iremonger, S.; Gittings, T.; Pithon, J.; O’Halloran, J.; Wilson, M.; O’Donnell, V.; Kelly, D.; French, L.; *et al.* *Assessment of Biodiversity at Different Stages of the Forest Cycle*; Dublin, Ireland, 2005. Available on line: http://www.epa.ie/pubs/reports/research
   /biodiversity/bioforestfinalreport/312%20report%20text%20final.PDF (accessed on 16 April 2015)
10. Waters, C.; Lawton, C. *Red Squirrel Translocation in Ireland*; Department of the Environment, H.A.L.G., Ed.; National Parks and Wildlife Service: Dublin, Ireland, 2011.
11. Wilson, M.; Gittings, T.; O’Halloran, J.; Kelly, T.; Pithon, J. *The Distribution of Hen Harriers in Ireland in Relation to Land Use Cover, Particularly Forest Cover*; COFORD: Arena House, Arena Road, Sandyford, Dublin 18, Ireland, 2006.
12. Wilson, M.; Irwin, S.; O’Donoghue, B.; Kelly, T.; O’Halloran, J. *The Use of Forested Landscapes by Hen Harriers in Ireland*;COFORD, Dept. Agriculture, Fisheries & Food, Agriculture House: Dublin, Ireland, 2010.

**Ecosystem Service:** Biodiversity

**Country:** Italy

**Concept:** Deadwood is assumed as the key variable for biodiversity

**Description:**

The biodiversity proxy used in the Italian case studies is the accumulating amount of deadwood in cubic meters per hectare (Stokland *et al.* 2012). The method used is described in Verkerk *et al.* (2011).

References

1. Stokland, J.N.; Siitonen, J.; Jonsson, B.G. *Biodiversity in Dead Wood*; Cambridge University Press: Cambridge, UK, 2012; p. 509.
2. Verkerk, P.J.; Lindner, M.; Zanchi, G.; Zudin, S. Assessing impacts of intensified biomass removal on deadwood in European forests. *Ecol. Indic.* **2011**, *11*, 27–35.

**Ecosystem Service:** Biodiversity

**Country:** Lithuania

**Concept:** Tree species diversity in the case study area is used as a proxy for biodiversity. The Shannon index for species diversity (Shannon 1948, Begon *et al.* 2006) has been used as a quantitative measure.

References

1. Begon, M.; Townsend, C.R.; Harper, J.L. *Ecology: From Individuals to Ecosystems*, 4th ed.;
   Wiley-Blackwell: Oxford, UK, 2006; p. 471.
2. Shannon, C.E. *The Mathematical Theory of Communication*; Univ. of Illinois Press: Urbana, IL, USA, 1948; pp. 3–91.

**Ecosystem Service:** Biodiversity

**Country:** Netherlands

**Concept:** An integration of broadleaved fraction, forest age, light at the forest floor and deadwood.

**Description:**

Calculations are all explained in depth in Hengeveld *et al.* (2014).

References

1. Hengeveld, G.M.; Didion, M.; Clerkx, S.; Elkin, C.; Nabuurs, G.J.; Schelhaas, M.J. The landscape-level effect of individual owner adaptations to climate change in Dutch forests. *Reg. Environ. Change* **2014**, doi: 10.1007/s10113-014-0718-5.

**Ecosystem Service:** Biodiversity

**Country:** Slovakia

**Concept:** Biodiversity is assumed being linked to tree species composition, horizontal and vertical stand structure, and crown differentiation.

**Description:**

The biodiversity index used in the Slovakian case studies is the J & D index (Jaehne and Dohrenbusch, 1997) which combines measures of the diversity of species composition, tree horizontal and vertical distribution and crown differentiation.

References:

1. Jaehne, S.; Dohrenbusch, A. Ein Verfahren zur Beurteilung der Bestandesdiversität. *Forstwiss. Cent.* **1997**, *116*, 333–345.

**Ecosystem Service:** Biodiversity

**Country:** Sweden

**Concept:** The indicators for the ecosystem service biodiversity in the Swedish case studies are: (I) proportion of broadleaved tree in the growing stock volume, in average over the simulated period; (II) amount of deadwood in m3 ha−1 and (III) number of large trees (>40 cm in diameter) per hectare.

**Description:**

Deciduous volume—(m3 ha−1). During the last century there has been a dramatic change of the landscape structure in that conifer species (pine and spruce), have become more and more dominating. In turn this has lead to a situation where biodiversity components tied to the presence of deciduous trees and stands are under pressure.

Dead wood—(m3 ha−1). The amount of dead wood includes downed dead wood and standing dead trees. There are numerous studies supporting the claim that the presence of dead wood is one of the most important prerequisites for preserving biodiversity (Stokland *et al.* 2012).

Large trees—(stems ha−1). Includes trees with a stem diameter in breast height exceeding 40 cm.
In the Northern part of Sweden, that is in the boreal zone, also large conifer trees are of interest as a biodiversity indicator. Large deciduous trees (>40 cm at breast height) are also of great importance but are so rare that projections of them becomes rather arbitrary.

References:

1. Stokland, J.N.; Siitonen, J.; Jonsson, B.G. *Biodiversity in Dead Wood*; Cambridge University Press: Cambridge, UK, 2012; p. 509.

Ecosystem Service: Carbon Sequestration

**Country:** Bulgaria

**Concept, Description, References:** See Slovakia

Ecosystem Service: Carbon Sequestration

**Country:** France

**Concept:** The amount of C stored in the trees is taken as a measure for C sequestration.

References:

1. Orazio, C.; Cordero, R.; Vallet, P.; Meredieu, C.; Jactel, H.; Hautdidier, B. New ecosystem services and risk indicators at landscape level for forests of the Landes of Gascony. **2015**, in press.

**Ecosystem Service:** Carbon Sequestration

**Country:** Germany

**Concept:** The method applied considers carbon sequestration in a broad sense. It takes into account the amount of C stored in the forest (aboveground and belowground living and dead biomass), as well as
C-storage in wood products depending on their use. In addition, fossil emission avoidance by wood use is included.

**Description:**

Although the methodology is complex, it has been developed in an own recent project conducted by the Bavarian State Forest Service, which focused on practical usefulness especially for the German Federal State of Bavaria, which includes both INTEGRAL case studies. The forest growth simulator SILVA which was also used for the case study scenario calculations was a core tool in the above-mentioned project. Thus, these methods for estimating carbon sequestration were fully compatible with the INTEGRAL-scenarios. See Klein and Schulz (2012) for a complete and detailed method description.

References:

1. Klein, D.; Schulz, C. Die Kohlenstoffbilanz der Bayerischen Forst- und Holzwirtschaft—Abschlussbericht 09/2012 (The Carbon Balance of the Bavarian Forest Sector and Wood Industry—Report #09/12), 184 p. Available online: http://www.lwf.bayern.de/service/publikationen/
   sonstiges/067410/index.php (aceessed on 15 April 2015).

**Ecosystem Service:** Carbon sequestration

**Country:** Ireland

**Concept:** Whole tree standing carbon (above and below ground) is quantified.

**Description:**

The basis for the estimation of carbon amounts stored in trees is tree biomass. Whole tree biomass of softwood species is calculated based on average tree volumes, biomass expansion factors and root-shoot ratios developed by Levy *et al.* (2004) . Aboveground biomass values for broadleaves are calculated on a stand level using a default equation developed by Teobaldelli *et al.* (2009) . Belowground biomass values are calculated using a default equation developed by Cairns *et al.* (1997). Default basic density values were used from the intergovernmental panel for climate change (IPCC, 2003). A value of 50% was used to convert total biomass dry weight to carbon (Smith *et al.*, 2013).

References:

1. Cairns, M.A.; Brown, S.; Helmer, E.H.; Baumgardner, G.A. Root biomass allocation in the world’s upland forests. *Oecologia* **1997**, *111*, 1–11.
2. IPCC, *Good Practice Guidance for Land Use*, *Land-Use Change and Forestry*; Penman, J., Gytarsky, M., Hiraishi, T., Eds.; Institute for Global Environmental Strategies: Kamiyamaguchi, Japan, 2003.
3. Levy, P.E.; Hale, S.E.; Nicoll, B.C. Biomass expansion factors and root: Shoot ratios for coniferous tree species in Great Britain. *Forestry* **2004**, *77*, 421–430.
4. Smith, J.E.; Heath, L.S.; Jenkins, J.C. *Forest Volume-to-Biomass Models and Estimates of Mass for Live and Standing Dead Trees of U.S. Forests*; Service, F., Ed.; United States Department of Agriculture, Northeastern Research Station: Philadelphia, PA, United States, 2013.
5. Teobaldelli, M.; Somogyi, Z.; Migliavacca, M.; Usoltsev, V.A. Generalized functions of biomass expansion factors for conifers and broadleaved by stand age, growing stock and site index.
   *For. Ecol. Manag.* **2009**, *257*, 1004–1013.

**Ecosystem Service:** Carbon Sequestration

**Country:** Italy

**Concept:** The carbon content of the standing tree aboveground biomass, calculated after Gallaun *et al.* (2010), was used as a measure for carbon sequestration.

References:

1. Gallaun, H.; Zanchi, G.; Nabuurs, G.J.; Hengeveld, G.; Schardt, M.; Verkerk, P.J. EU-wide maps of growing stock and above-ground biomass in forests based on remote sensing an field measurements. *For. Ecol. Manag.* **2010**, *260*, 252–261.

**Ecosystem Service:** Carbon Sequestration

**Country:** Lithuania

**Concept:** Living trees’ aboveground biomass was estimated and converted into carbon mass with a factor of 0.5. The latter was used as a measure for carbon sequestration. The applied procedure was according to an official standard defined for the country of Lithuania (see reference).

References:

1. Harmonized Methodology for Collecting Data and Calculating the Amounts of Absorbed and Emitted Green-House Gases in the Sectors of Land-Use Changes and Forestry. Approved by Minister of Environment of Republic of Lithuania and Minister of Agriculture of Republic of Lithuania, October 9, 2012, No. D1-819/3D-790. Available online: https://www.e-tar.lt/portal/
   legalAct.html?documentId=TAR.0ACB228423D2 (accessed on 15 April 2015).

**Ecosystem Service:** Carbon Sequestration

**Country:** Netherlands

**Concept:** Total tree standing biomass is used as a proxy for carbon sequestration (detailed description in Hengeveld *et al.* 2014).

References:

1. Hengeveld, G.M.; Didion, M.; Clerkx, S.; Elkin, C.; Nabuurs, G.J.; Schelhaas, M.J. The landscape-level effect of individual owner adaptations to climate change in Dutch forests. *Reg. Environ. Change* **2014**, doi:10.1007/s10113-014-0718-5.

**Ecosystem Service:** Carbon Sequestration

**Country:** Portugal

**Concept:** Standing aboveground live tree biomass was converted into carbon mass and used as a measure of carbon sequestration. This belongs to the standard output of the growth and yield models used in the Portuguese case studies (see references). Standing and Harvested Volumes are direct model outputs. See references for models in the article.

**Ecosystem Service:** Carbon Sequestration

**Country:** Slovakia

**Concept:** Standing aboveground live tree biomass was converted into carbon mass and used as a measure of carbon sequestration.

**Description:**

The carbon content in stand growing biomass was calculated as ratio of C from tree and stand biomass determined by an allometric equation published by Fabrika (2005, 2008). C-ratio was determined for Slovak conditions by Bublinec (1994) and depends on tree species.

References:

1. Bublinec, E*. Concentration, Acumulation and Cycling of Elements in Beech and Spruce Ecosystem*; Acta Dendrobiologica, Institute of Forest Ecology, Slovac Academy of Sciences: Zvolen, Slovakia, 1994; p. 85.
2. Fabrika, M. Simulator of Forest Biodynamics Sibyla. (Framework, Construction and Software Solution). Habilitation Thesis, Technical University in Zvolen, Zvolen, Slovakia, 2005; p. 238.
3. Fabrika, M. *Allometric Model for Biomass Calculation*; Technical University in Zvolen: Zvolen, Slovakia, 2008; p. 5.

**Ecosystem Service:** Carbon Sequestration

**Country:** Sweden

**Concept:** Above and below ground total carbon stock are taken as measure of carbon sequestration. This belongs to the standard output of the models applied. See references for the models in the article.

Ecosystem Service: Harvested Wood

**Country:** Bulgaria

**Concept, Description, References:** See Slovakia

**Ecosystem Service:** Harvested Wood

**Country:** France

**Concept:** Standing and Harvested Volumes are direct model outputs. See references for models in
the article.

**Ecosystem Service:** Harvested Wood

**Country:** Germany

**Concept:** Standing and Harvested Volumes are direct model outputs. See references for models in
the article.

**Ecosystem Service:** Harvested Wood

**Country:** Ireland

**Concept:** Standing and Harvested Volumes are direct model outputs. See references for models in
the article.

**Ecosystem Service:** Harvested Wood

**Country:** Italy

**Concept:** Standing and Harvested Volumes are direct model outputs. See references for models in
the article.

**Ecosystem Service:** Harvested Wood

**Country:** Lithuania

**Concept:** Standing and Harvested Volumes are direct model outputs. See references for models in
the article.

**Ecosystem Service:** Harvested Wood

**Country:** Netherlands

**Concept:** Harvested wood was measured as biomass (Hengeveld *et al.* 2014).

References:

1. Hengeveld, G.M.; Didion, M.; Clerkx, S.; Elkin, C.; Nabuurs, G.J.; Schelhaas, M.J. The
   landscape-level effect of individual owner adaptations to climate change in Dutch forests. *Reg. Environ. Change* **2014**, doi:10.1007/s10113-014-0718-5.

**Ecosystem Service:** Harvested Wood

**Country:** Portugal

**Concept:** In the Portuguese case studies, harvested wood was subdivided into different sub-categories (conifer sawlogs, cork oak fuelwood, eucalypt pulpwood, hardwood timber). They are part of the standard output of the applied growth and yield models (see references for models in the article).

**Ecosystem Service:** Harvested Wood

**Country:** Slovakia

**Concept:** Standing and Harvested Volumes are direct model outputs. See references for models in
the article.

**Ecosystem Service:** Harvested Wood

**Country:** Sweden

**Concept:** Standing and Harvested Volumes are direct model outputs. See references for models in
the article.

Ecosystem Service: Recreation

**Country:** Bulgaria

**Concept, Description, References:** See Slovakia

**Ecosystem Service:** Recreation

**Country:** France

**Concept:** Recreation value is assumed to be linked to the biodiversity index reported.

References:

1. Orazio, C.; Cordero, R.; Vallet, P.; Meredieu, C.; Jactel, H.; Hautdidier, B. New ecosystem services and risk indicators at landscape level for forests of the Landes of Gascony. **2015**, in press.

**Ecosystem Service:** Recreation

**Country:** Germany

**Concept:** A forest stand’s recreation value is assumed to depend on (I) stand type; (II) stand density; and (III) logging acitivities.

**Description:**

The method applied for assessing a stand’s recreation value in the German case studies was developed based on corresponding literature (Pröbstl *et al.* 2010, Bell *et al.* 2009, Stölb 2005, Ammer and Pröbstl, 1991) supplemented by information given by local experts in stakeholder workshops arranged within the INTEGRAL framework.

Recreation value is expressed by an index in the range between 1 (lowest possible recreation value) and 5 (maximum recreation value). It is the weighted mean of three indices with each the same range of possible values which take into account (I) stand type; (II) stand density; (III) logging activities:

Stand type index (weight 30%): In general, Germans feel more comfortable in (decidous-conifer) mixed forest stands than in pure stands. Deciduous species are preferred to coniferous ones. Thus, a pure conifer stand would be attributed an index value of 1, a mixed forest with equal deciduous/conifer proportions would be attributed a 5.

Stand density (weight 35%): People in general do not like very light or very dark (dense) forest areas. A medium stand density is preferred. Thus, very light stands and very dense stands with a stand density index (SDI) value (Reineke 1933) below 150 and above 1000, respectively, are attributed an index value of 1, while intermediate stand densities (SDI between 600 and 700) are assigned an index value of 5.

Logging activity index (weight 35%): The average forest visitors want to have a walk in what they perceive as a tidy forest, but they do not want to encounter logging activities. Thus, both, no forest management at all (harvest less than 2.5 m3 per ha in a five-year period) and high logging volumes (harvest more than 50 m3 per ha in five years) are attributed an index value of 1. Light logging activities (harvest between 15 and 20 m3 ha−1 in a five years’ period is assumed as an optimum and given an index value of 5.

References:

1. Ammer, U.; Pröbstl, U. *Freizeit und Natur: Probleme und Lösungsmöglichkeiten einer ökologisch verträglichen Freizeitnutzung*; Paul Parey: Hamburg, Germany, 1991; p. 228.
2. Bell, S.; Simpson, M.; Tyrväinen, L.; Sievänen, T.; Pröbstl, U.; Eds. *European Forest Recreation and Tourism: A Handbook*; Taylor & Francis: Milton, Abingdon, UK, 2010; p. 272.
3. Pröbstl, U.; Wirth, V.; Elands, B.; Bell, S.; (Eds.) *Management of Recreation and Nature Based Tourism in European Forests*; Springer: Berlin, Heidelberg, Germany, 2010; p. 348.
4. Reineke, L.H. Perfecting a stand-density index for even-aged forests. *J. Agric. Res.* **1933**, *46*,
   627–638.
5. Stölb, W. *Waldästhetik: über Forstwirtschaft, Naturschutz und die Menschenseele*; Verlag Norbert Kessel: Remagen-Oberwinter, Germany, 2005; p. 400.

**Ecosystem Service:** Recreation

**Country:** Ireland

**Concept:** Forest recreation values, on a scale from 1 to 10, were derived directly from a study by Edwards *et al.* (2012). They implemented a Delphi method to determine these values for various European landscapes and in this project the recreational scores from the Great Britain region were used.

References:

1. Edwards, D.M.; Jay, M.; Jensen, F.S.; Lucas, B.; Marzano, M.; Montagné, C.; Peace, A.; Weiss, G. Public Preferences Across Europe for Different Forest Stand Types as Sites for Recreation.
   *Ecol. Soc.* **2012**, *17*, 27.

**Ecosystem Service:** Recreation

**Country:** Italy

**Concept:** Recreational scores according to forest types and management systems were attributed to each stand following the method of Edwards *et al.* (2011).

References:

1. Edwards, D.; Jensen, F.S.; Marzano, M.; Mason, B.; Pizzirani, S.; Schelhaas, M.J. A theoretical framework to assess the impacts of forest management on the recreational value of European forests. *Ecol. Indic.* **2011**, *11*, 81–89.

**Ecosystem Service:** Recreation

**Country:** Lithuania

**Concept:** The recreation value index applied is based on the assumption that the suitability of forest stands for recreation is dependent on the prevailing tree species, soil type, age and relative stocking.

**Description:**

Each forest compartment is graded in the scale 0-100. A score of 100 (=optimum recreation value) are attributed to premature and mature pine forests on dry soils, with a stocking degree of 0.4–0.8.
A score of 0 grades is attributed to young grey alder stands on wet or organic soils with very high or very low stand densities (stocking degree <0.4 or >0.8). The method follows Riepšas (2007).

References:

1. Riepšas, E. *Rekreacinė miškininkystė [Recreational forestry], mokomoji knyga (I dalis) [Study book, Part I]*; Lithuanian University of Agriculture: Akademija, Kaunas reg, Lithuania, 2007; p. 42.

**Ecosystem Service:** Recreation

**Country:** Portugal

**Concept:** Potential recreation areas were identified considering criteria by the Portuguese Forest Service (Garcia-Gonzalo *et al.* 2013) such as presence of recreation features and equipment (e.g., soccer fields, picnic areas, fountains, monumental trees), proximity to municipal roads (250 meters buffer), and proximity to streams and/or rivers (80 m buffer) (Hunter 1990; Brinson and Verhoeven 1999).

References:

1. Brinson M, Verhoeven J. Chapter 8—Riparian Forest. In *Maintaining Biodiversisty in Forest Ecosystems*; Hunter, M.L., Ed.; Cambridge University Press: Cambridge, UK, 1999; pp. 265–291.
2. Garcia-Gonzalo, J.; Palma, J.; Freire, J.; Tomé, M.; Mateus, R.; Rodríguez, L.C.E.; Bushenkov, V.; Borges, J.G. A decision support system for a multi stakeholder’s decision process in a Portuguese National Forest. *For. Syst.* **2013**, *22*, 359–373.
3. Hunter, M.L. Chapter 6—Shores. In *Principles of Managing Forests for Ecological Diversity*; Prentice-Hall, Inc.: Upper Saddle River, NJ, USA, 1990; pp. 139–153.

**Ecosystem Service:** Recreation

**Country:** Slovakia

**Concept:** The Recreation value of a forest stand is assumed to increase with increasing horizontal and vertical structure.

**Description:**

The recreation index used in the Slovakian case studies was calculated as simple mean of three separate indices which were rescaled to the interval 0–1: index E1—species equilibrium—published by Pielou (1975), the horizontal structure index proposed by Clark and Evans (1954) and the species profile index published by Pretzsch (2009).

References:

1. Clark, P.J.; Evans, F.C. Distance to nearest neighbor as a measure of spatial relationships in populations. *Ecology* **1954**, *35*, 445–453.
2. Pielou, E.C. *Ecological Diversity*; Wiley: New York, NY, USA, 1975; p. 165.
3. Pretzsch, H. *Forest Dynamics*, *Growth and Yield*; Springer: Berlin, Heidelberg, Germany, 2009;
   pp. 281.

**Ecosystem Service:** Recreation

**Country:** Sweden

**Concept:** A recreation score was used as a proxy for the recreational value of forest stands (from Lindhagen and Hörnsten 2000). It differentiated on states (height < 2 m, ≥2 m and before first thinning, after first thinning) and it is positively correlated with unevenaged forest, proportion of broadleaved species, and the occurrence of large trees. It is negatively correlated with the occurrence of pine and spruce,
lying trees, harvest residues and dead wood.

References:

1. Lindhagen, A.; Hörnsten, L. Forest recreation in 1977 and 1997 in Sweden: changes in public preferences and behaviour. *Forestry* **2000**, *73*, 143–153.

Ecosystem Service: Standing Volume

**Country:** Bulgaria

**Concept, Description, References:** See Slovakia

**Ecosystem Service:** Standing Volume

**Country:** France

**Concept:** Standing and Harvested Volumes are direct model outputs. See references for models in
the article.

**Ecosystem Service:** Standing Volume

**Country:** Germany

**Concept:** Standing and Harvested Volumes are direct model outputs. See references for models in
the article.

**Ecosystem Service:** Standing Volume

**Country:** Slovakia

**Concept:** Standing and Harvested Volumes are direct model outputs. See references for models in
the article.

**Ecosystem Service:** Standing Volume

**Country:** Sweden

**Concept:** Standing and Harvested Volumes are direct model outputs. See references for models in
the article.

Ecosystem Service: Tourism

**Country:** Bulgaria

**Concept:** **The touristic value of a forest stand is assumed to increase with its aesthetic appeal which is** increasing with horizontal and vertical stand structure.

**Description:**

Like the recreation index used in the Slovakian case studies the touristic value index in the Bulgarian case studies was calculated as simple mean of three separate indices which were rescaled to the interval 0–1: index E1—species equilibrium—published by Pielou (1975), the horizontal structure index proposed by Clark and Evans (1954) and the species profile index published by Pretzsch (2009).

References:

1. Clark, P.J.; Evans, F.C. Distance to nearest neighbor as a measure of spatial relationships in populations. *Ecology* **1954**, *35*, 445–453.
2. Pielou, E.C. *Ecological Diversity*; Wiley: New York, NY, USA, 1975; p. 165.
3. Pretzsch, H. *Forest Dynamics, Growth and Yield*; Springer: Berlin, Heidelberg, Germany, 2009; p. p. 281.

**Ecosystem Service:** Tourism

**Country:** Sweden

**Concept:** A beauty score was used as proxy for the touristic value of the area (from Pukkala *et al.* 1988). It improves with stand diameter, volume of pine and volume of deciduous trees and decreases with number of stems.

References:

1. Pukkala, T.; Kellomäki; S; Mustonen, E. Prediction of the amenity of a tree stand. *Scand. J. For. Res.* **1988**, *3*, 533–544.

Ecosystem Service: Quality Water Provision

**Country:** Germany

**Concept:** Quality water provision is assumed to depend on the potential renewal of ground water which in turn depends on stand structure under given climate conditions. The fundamental idea is that, on the
one hand, renewal would be insufficient with only a small share of precipitation reaching the ground. On the other hand, too much precipitation on the ground would be unfavorable due to nitrate leaching.

**Description:**

In order to obtain realistic estimates for potential ground water renewal in the case study area
Munich South, where quality water provision was taken into account as an important ecosystem service, we generated representative forest stands based on the available forest inventory data. This was accomplished with the stand structure generator STRUGEN (Pretzsch 1997) 664 as implemented in the forst growth simulator SILVA (Pretzsch *et al.* 2002). These stand types were defined by dominating species
(Norway spruce, European beech, common oak, Scots pine. Douglas fir), stand development stage
(young, medium, old), and stand density (low, medium, high), measured with Reineke’s (1933) stand
density index.

These stands were simulated over a 20 years’ period with the eco-physiological forest model BALANCE (Grote & Pretzsch 2002) for typical climate and soil conditions of the case study area. As BALANCE simulates the relevant water flows (precipitation, evapotranspiration, interception), the potential ground water renewal could be estimated for each stand type. This information was used to calibrate a function which estimates the potential ground water renewal (valid for the case study area Munich South) dependent on dominating tree species, stand height (as a proxy for development stage), and stand density. The resulting estimate for a given stand is mapped to an index value between 1 (worst quality water provision) and 5 (best quality water provision). As mentioned above, very low groundwater refill rates (<200 mm year–1) as well as very high ones (>750 mm year–1) are considered most unfavorable and thus are assigned an index value of 1. Intermediate rates (500–600 mm year–1) are taken as an optimum and thus obtain an index value of 5.

References:

1. Grote, R.; Pretzsch, H. A model for individual tree development based on physiological processes. *Plant Biol.* **2002**, *4*, 167–180.
2. Pretzsch, H. Analysis and modeling of spatial stand structures. Methodological considerations based on mixed beech-larch stands in Lower Saxony. *For. Ecol. Manag.* **1997**, *97*, 237–253.
3. Pretzsch, H.; Biber, P.; Ďurský, J. The single tree based stand simulator SILVA. Construction, application and evaluation. *For. Ecol. Manag.* **2002**, *162*, 3–21.
4. Reineke, L.H. Perfecting a stand-density index for even-aged forests. *J. Agric. Res.* **1933**, *46*,
   627–638.

**Ecosystem Service:** Quality Water Provision

**Country:** Ireland

**Concept:** The equation to determine water sedimentation risk is based on the RUSLE (Revised Universal Soil Loss Equation); an equation designed to estimate point source soil erosion (Mitsova and Mitas, 1999). Sivertun and Prange (2003) used more refined techniques for estimating the equation’s parameters, therefore their model and parameters were used in this project. For land-use approaches not covered by the literature (e.g., buffer zones), interpolations were used to determine appropriate parameters.

References:

1. Mitsova, H.; Mitas, L. *Modeling Soil Detachment with RUSLE3d Using GIS*; Geographic Modelling Systems Laboratory, University of Illinois Urbana–Champaign: Urbana, IL, USA, 1999.
2. Sivertun, Å.; Prange, L. Non-point source critical area analysis in the Gisselö watershed using GIS. *Environ. Model. Softw.* **2003**, *18*, 887–898.

**Ecosystem Service:** Quality Water Provision

**Country:** Slovakia

**Concept:** Quality water provision is assumed to depend on the share of conifer species and stand density.

**Description:**

The degree of quality water provision was expressed by the share of coniferous species on stand species composition in the vicinity of water resources and based on a relative stand density index. The main idea being that a higher proportion of conifers and a higher stand density probably leads to better water interception and filtration. The relative stand density index was calculated as the ratio of the actual SDI value (Reineke 1933) and the maximal possible SDI. The latter was estimated based on Slovak growth and yield tables (Halaj, Petráš 1998).

References:

1. Halaj, J.; Petráš, R. *Growth and Yield Tables of Main Tree Species*; Slovak Academic Press: Bratislava, Slovakia, 1998; p. 325, in Slovak.
2. Reineke, L.H. Perfecting a stand-density index for even-aged forests. *J. Agric. Res.* **1933**, *46*,
   627–638.

**Ecosystem Service:** Quality Water Supply

**Country: Sweden**

**Concept:** The indicators for this ecosystem service are (I) dissolved Methylmercury in mg (ha year)–1 and (II) Dissolved Organic Content (DOC) in kg (ha year)–1, both in average over the simulated period.

**Description:**

For calculating the values of dissolved Methylmercury, the approach presented in Eriksson *et al.* (2010) was used. The increase in total export of Methylmercury is assumed to follow from both final felling and thinning and to be 3 times larger than that from an undisturbed, growing forest, and to persist for 10 years, which is in consistency with the assumptions given by Bishop *et al.* (2009). The base level is set to 0.3 mg ha−1 year−1 following data from Balån presented by Sørensen *et al.* (2009).

The increase of DOC from final felling is estimated with the model presented by Öhman *et al.* (2009), resulting in an increase in the first 5-years period of 24% and in the second 5-years period of 15% over the base level. The base level of 50 kg·ha−1·year−1 was set based on data from Balån presented by
Laudon *et al.* (2009). Adding the effect of increased water flow according to the model
presented above, it will be 87 and 72 kg·ha−1·year−1 for period 1 and 2, respectively.

References:

1. Bishop, K.; Allan, C.; Bringmark, L.; Garcia, E.; Hellsten, S.; Högbom, L.; Johansson, K.; Lomander, A.; Meili, M.; Munthe, J. *et al.* The Effects of Forestry on Hg Bioaccumulation in Nemoral/Boreal Waters and Recommendations for Good Silvicultural Practice. *Ambio* **2009**, *38*, 373–380.
2. Eriksson, L.O.; Löfgren, S. *Implications for Forestry of Stream Water Chemical Demands*; Arbetsrapport Umeå, Institutionen för skoglig resurshushållning, SLU. 271: Umeå, Sweden, 2010.
3. Laudon, H.; Hedtjärn, J.; Schelker, J.; Bishop, K.; Sørensen, R.; Ågren, A. Response of Dissolved Organic Carbon following Forest Harvesting in a Boreal Forest. *Ambio* **2009**, *38*, 381–386.
4. Öhman, K.; Seibert, J.; Laudon, H. An Approach for Including Consideration of Stream Water Dissolved Organic Carbon in Long Term Forest Planning. *Ambio* **2009**, *38*, 387–394.
5. Sørensen, R.; Meili, M.; Lambertsson, L.; von Brömssen, C.; Bishop, K. The effects of forest harvest operations on mercury and methylmercury in two boreal streams: Relatively small changes in the first two years prior to site preparation. *Ambio* **2009**, *38*, 364–372.

Ecosystem Service: Water and Soil Protection

**Country:** Lithuania

**Concept:** The Index used for water and soil protection is calculated based on the following factors: (I) elevation and location of a given forest compartment on the slope; (II) soil mechanical properties; (III) location of the forest compartment regarding the shoreline of water bodies; (IV) location of the forest compartment regarding agricultural fields, industrial objects and roads; and (V) characteristics of forest stands, such as tree species composition, stocking index and age (Pauliukevičius and Kenstavičius 1995).

References:

1. Pauliukevičius, G.; Kenstavičius, J. *Ekologiniai miškų teritorinio išdėstymo pagrindai [Ecologic fundamentals of spatial forest distribution]*; Institute of Geography: Vilnius, Lithuania, 1995;
   p. 289.

Ecosystem Service: Firesafety

Country: Netherlands

**Concept:** The degree of a forest’s firesafety is assumed to depend on (I) the presence or absence of heath; (II) the presence or absence of conifer species; and (III) tree height (Hengeveld *et al.* 2014).

References:

1. Hengeveld, G.M.; Didion, M.; Clerkx, S.; Elkin, C.; Nabuurs, G.J.; Schelhaas, M.J. The landscape-level effect of individual owner adaptations to climate change in Dutch forests. *Reg. Environ. Change*, **2014**, doi:10.1007/s10113-014-0718-5.

Ecosystem Service: Hunting

**Country:** Slovakia

**Concept:** The provision of the ecosystem service hunting for a given forest area was measured
by income-to-cost ratio.

**Description:**

The virtual forest landscapes resulting from the simulation scenarios (comprising all available spatial and quantitative information) were separately presented to experts in game management. Given
this information, the experts estimated incomes and costs of game management.

Ecosystem Service: Landscape Aesthetics

**Country:** Netherlands

**Concept:** The aesthetical value of a landscape is assessed as an integration of (I) known preferences for certain forest and landscape types; (II) forest age; and (III) landscape patchiness (Hengeveld *et al.* 2014, following Edwards *et al.* 2012).

References:

1. Edwards, D.M.; Jay, M.; Jensen, F.S.; Lucas, B.; Marzano, M.; Montagné, C.; Peace, A.; Weiss, G. Public preferences across Europe for different forest stand types as sites for recreation. *Ecol. Soc.* **2012**, *17*, 27.
2. Hengeveld, G.M.; Didion, M.; Clerkx, S.; Elkin, C.; Nabuurs, G.J.; Schelhaas, M.J. The landscape-level effect of individual owner adaptations to climate change in Dutch forests. *Reg. Environ. Change* **2014**, doi:10.1007/s10113-014-0718-5.

Ecosystem Service: Mushroom Production

**Country:** Slovakia

**Concept:** Mushroom production was assessed by expert estimates

**Description:**

The virtual forest landscapes resulting from the simulation scenarios (comprising all available spatial and quantitative information) were separately presented to expert mycologists. Given this information, the experts estimated the potential harvest mushroom biomass in kg (ha year)−1 .

Ecosystem Service: Natural Dynamics Protection

**Country:** Netherlands

**Concept:** Natural dynamics protection is expressed as the forest where, according to a given scenario, no active management takes place.

References:

1. Hengeveld, G.M.; Didion, M.; Clerkx, S.; Elkin, C.; Nabuurs, G.J.; Schelhaas, M.J. The landscape-level effect of individual owner adaptations to climate change in Dutch forests. *Reg. Environ. Change* **2014**, doi:10.1007/s10113-014-0718-5.

Ecosystem Service: Reindeer Area

**Country:** Sweden (Vilhelmina case study only)

**Concept:** Moderate or low stand density and the absence of *Pinus contorta* determine a forest area’s qualification for summer reindeer herding.

**Description:**

The Vilhelmina caste study area is close to the mountain range where the reindeers are foraging in the summer. Food during winter, which is the limiting factor as regards herd size, is closer to the coast. Thus, from the reindeer herders’ point of view, the forests of Vilhelmina are not critical in terms of foraging, but should be attractive to pass through and not unfavorable for foraging. Therefore, the criteria for amenable areas are formulated in terms of number of stems and basal area; either the height of the stand is less than 3 meters and the number of stems is less than 1600 per ha, or the basal area is less than 20 m2 ha−1. Lodgepole pine (*Pinus contorta* Dougl. ex Loud.) stands never qualify as reindeer areas.

Ecosystem Service: Cork Production

**Country:** Portugal

**Concept:** Cork Production is a standard output of the growth model Suber (Tomé *et al.* 1998, Almeida 2011 and Paulo 2011) used for cork oak in the Portuguese case studies.

References:

1. Almeida, A. Desenvolvimento de um sistema para a inicialização do modelo SUBER. Ph.D. Thesis, Technical University of Lisbon, Lisbon, Portugal, 2011.
2. Paulo, J.A. Desenvolvimento de um sistema para apoio à gestão sustentável de montados de sobro. Ph.D. Thesis, Technical University of Lisbon, Lisbon, Portugal, 2011.
3. Tomé, M.; Coelho, M.B.; Lopes, F.; Pereira, H. *Modelo de produção para o montado de sobro em Portugal*; Pereira, H., ed.; European Conference on Cork-Oak and Cork: Lisboa, Portugal, 1998; pp. 22–46.

Ecosystem Service: Pine Cone Production

**Country:** Portugal

**Concept:** Pine cone production belongs to the standard output of the growth model Pinea (Freire 2009) which has been used for *Pinus pinea* in the Portuguese case studies.

References:

1. Freire, J.P.A. Modelação do crescimento e da produçãode pinha no pinheiro manso. Ph.D. Thesis, Technical University of Lisbon, Lisbon, Portugal, 2009.

Ecosystem Service: Other Protective Functions

**Country:** Portugal

**Concept:** Other protective functions comprise the ecosystem services coastal protection, sand dunes embankment, and watershed protection as taken into account in the Leiria case study. The provision of these services was not directly simulated as the areas providing these services result from zoning defined by the Portuguese Forest Service (Garcia-Gonzalo *et al.* 2013). However, the scenario results were assessed in terms of these services’ performance by experts.

References:

1. Garcia-Gonzalo, J.; Palma, J.; Freire, J.; Tomé, M.; Mateus, R.; Rodríguez, L.C.E.; Bushenkov, V.; Borges, J.G. A decision support system for a multi stakeholder’s decision process in a Portuguese National Forest. *For. Syst.* **2013**, *22*, 359–373.

Supplementary Information 3—Validation of Forest Growth Models

In the following section we substantiate the applicability and validity of the forest growth models used in the study for the case study areas they have been applied for. The descriptions are ordered alphabetically by country (Bulgaria, France, Germany, Ireland, Italia, Lithuania, Netherlands, Portugal, Slovakia, Sweden).

**Country:** Bulgaria

**Model:** Individual tree based model SIBYLA

**Applicability:**

For the Bulgarian case studies, the individual tree based forest growth model SIBYLA (developed and parameterized with Slovak forest data) has been used. Although the model has not been formally validated for Bulgarian conditions, there are good arguments for applying it there. First, the tree species and the natural conditions of Bulgaria are largely comparable to those for which SIBYLA was calibrated and validated. Second, the silvicultural concepts needed for simulating the Bulgarian case studies are covered the standard application range of SIBYLA. Third, the simulation results were presented in workshops to expert stakeholders who assessed them as completely plausible and realistic. In addition SIBYLA is fully compatible with Bulgarian forest inventory data.

References:

See Slovakia

**Country:** France

**Model:** Tree and stand models (I) Fagacées and the (II) Maritime Pine Model, both embedded in the CAPSIS multi-model pool.

**Applicability:**

Both models have been developed and validated in many aspects with data including the case study area (see references below).

References:

Model Fagacées:

1. Dhôte, J.F.; de Hercé, E. Un modèle hyperbolique pour l’ajustement de faisceaux de courbes hauteur-diamètre*. Can. J. For. Res.* **2013**, *24*, 1782–1790.
2. Dhôte, J.F. Définition de scénarios d’éclaircie pour le Hêtre et le Chêne. *Rev. For. Fr.* **1995**, *67*, 106–110.
3. Dhôte, J.F. Effets des éclaircies sur le diamètre dominant dans des futaies régulières de Hêtre ou de Chêne sessile. *Rev. For. Fr.* **1997**, 557–578, doi:10.4267/2042/5655.
4. Dhôte, J.F. Compétition entre classes sociales chez le Chêne sessile et le Hêtre. *Rev. For. Fr.* **1999**, doi:10.4267/2042/5439.
5. Dhôte, J.F.; Hatsch, E.; Rittié, D. Forme de la tige, tarifs de cubage et ventilation de la production en volume chez le chêne sessile. *Ann. Sc. For.* **2000**, *57*, 121–142.
6. Dhôte, J.F.; Hatsch, E.; Rittié, D. Profil de la tige et géométrie de l’aubier chez le Chêne sessile (*Quercus petraea* Liebl.). *Bull. Techn. ONF* **1997**, *33*, 59–82.
7. Hatsch, E. *Répartition De L’aubier Et Acquisition De La Forme De La Tige Chez Le Chêne Sessile (Q. Petraea (Matt) Liebl.)*; Ecole Nationale du Génie Rural, des Eaux et des Forêts (ENGREF): Paris, France, 1997.
8. Nepveu, G.; Dhôte, J.F. *Sylviculture et qualité du bois de Chêne sessile*; Rapport Final de la Convention INRA-ONF 1992-96 Sylviculture et Qualité du Bois de Chêne”; INRA: Champenoux France, 1998; p. 68.

Maritime Pine Model:

1. Lemoine, B. Growth and yield of maritime pine (*Pinus pinaster* Ait.): The average dominant tree of the stand. *Ann. For. Sci.* **1991**, *48*, 593–611.
2. Salas-González, R.; Houllier, F.; Lemoine, B.; Pignard, G. Forecasting wood resources on the basis of national forest inventory data. Application to *Pinus pinaster* Ait. in Southwestern France. *Ann. For. Sci.* **2001**, *58*, 785–802.

**Country:** Germany

**Model:** Individual tree based model SILVA

**Applicability:**

The German case study areas are—in terms of tree species, region, site and climate conditions, and silvicultural treatment—totally covered by the data material used for calibrating and validating SILVA (Pretzsch 2009, Pretzsch *et al*. 2002).

References:

1. Pretzsch, H. *Forest Dynamics*, *Growth and Yield*; Springer: Berlin, Heidelberg, Germany, 2009; pp. 503.
2. Pretzsch, H.; Biber, P.; Dursky, J. The single tree-based stand simulator SILVA: Construction, application and evaluation. *Abstr. For. Ecol. Manag.* **2002**, *162*, 3–21.

**Country:** Ireland

**Model:** Spatial Decision Support System (including stand level models) Remsoft Woodstock

**Applicability:**

The model used for the two Irish case study areas was specifically developed for this project. It was based on a harvest scheduling model that was developed by Coillte Teoranta, the Irish State Forestry Board. This basic model that focused on timber production and profit maximisation was modified to a multi-criteria goal programming formulation and a range of ecosystem services (ESs) was added.

The timber production component has been validated previously as part of Coillte’s operational use of the basic model. The forecasts for the other ESs were validated to some extent by the stakeholders and experts involved in the project, including those who provided input during the development stage of the model as well as those present at the participatory workshops.

The model format was chosen based on the idea of multi-criteria optimisation, to reflect the project objective to produce mixes of ecosystem services that correspond to stakeholders’ desired outputs. The goal programming formulation allows for the inclusion of a full range of ecosystem services in the objective function, using weightings to express the relative importance of each and to model attitude changes, by forest owner types, as a result of the introduction of new policies.

**Country:** Italia

**Model:** Large level matrix model EFISCEN

**Applicability:**

The EFISCEN (European Forest Information Scenario) model was designed to cover all relevant forest types across Europe (Schelhaas *et al.* 2007). For the Italian case studies, information about tree species, site fertility and climate conditions were taken from the EFISCEN database (Schuck *et al.* 2003) and the United Nations European Forest Sector Outlook Study II (United Nations 2011). Tree cover density was derived from Brus *et al.* (2011), and calibration values for growing stock, net annual increment, management intensity and frequency were taken from Karjalainen *et al.* (2003).

References:

1. Brus, D.J.; Hengeveld, G.M.; Walvoort, D.J.J.; Goedhart, P.W.; Heidema, A.H.; Nabuurs, G.J.; Gunia, K. Statistical mapping of tree species over Europe. *Eur. J. For. Res.* **2011**, *131*, 145–175.
2. Karjalainen, T.; Pussinen, A.; Liski, J.; Nabuurs, G.J.; Eggers, T.; Lapveteläinen, T.; Kaipainen, T. Scenario analysis of the impacts of forest management and climate change on the European forest sector carbon budget. *For. Policy Econ.* **2003**, *5*, 141–155.
3. Schelhaas, M.J.; Eggers, J.; Lindner, M.; Nabuurs, G.J.; Pussinen, A.; Päivinen, R.; Schuck, A.; Verkerk, P.J.; van der Werf, D.C.; Zudin, S. *Model documentation for the European Forest Information Scenario Model (EFISCEN 3.1.3)*; Alterra Rapport 1559. EFI Technical Report 26;
   Alterra—Wageningen University and Research: Wageningen, The Netherlands, 2007.
4. Schuck, A.; Päivinen, R.; Häme, T.; van Brusselen, J.; Kennedy, P.; Folving, S. Compilation of a European forest map from Portugal to the Ural mountains based on earth observation data and forest statistics. *For. Policy Econ.* **2003**, *5*, 187–202.
5. United Nations. *The European Forest sector Outlook Study II*; United Nations Economic Commission For Europe, Food and Agriculture Organization of the United Nations: Geneva, Switzerland, 2011; p. 107.

**Country:** Lithuania

**Model: Large scale stand-level forestry simulator Kupolis**

**Applicability:**

The simulator Kupolis was validated to be used at national and regional levels, including the INTEGRAL case study areas, around the year 2000. The included growth models are parameterized to fit Lithuanian conditions; however, they also largely fit for Latvian and Belorussian conditions, and the Russian Kaliningrad region. Validation and operational use of Kupolis is documented in Kuliešis and Petrauskas (2000). The INTEGRAL case study areas are among the forest areas explicitly reported in this paper.

References:

1. Kuliešis A, Petrauskas E. *Lietuvos Miško Naudojimo XXI Amžiuje Prognozė [Lithuanian Forest Resources in the XXI Century]*; Naujasis Lankas: Kaunas, Lithuania, 2000; p. 146.

**Country:** Netherlands

**Model:** Process based landscape simulation model LandClim

**Applicability:**

LandClim is parameterized for 33 major European tree species; as a process based model it covers a broad range of climate and site conditions including the Dutch case study area South East Veluwe. For the same landscape it has been successfully applied in the context of climate change and forest management (Yousefpour *et al.* 2015, Hengeveld *et al.* 2014).

References:

1. Hengeveld, G.M.; Didion, M.; Clerkx, S.; Elkin, C.; Nabuurs, G.J.; Schelhaas, M.J. The landscape-level effect of individual-owner adaptation to climate change in Dutch forests. *Reg. Environ. Change* **2014**, doi:10.1007/s10113-014-0718-5.
2. Yousefpour, R.; Didion, M.; Jacobsen, J.B.; Meilby, H.; Hengeveld, G.M.; Schelhaas, M.J.; Thorsen, B.J. Modelling of adaptation to climate change and decision-makers behaviours for the Veluwe forest area in the Netherlands. *For. Policy Econ.* **2015**, *54*, 1–10.

**Country:** Portugal

**Model:** SADfLOR toolbox, comprising empirical and process-based individual and stand level models

**Applicability:**

All the growth models in the SADfLOR toolbox have been developed for Portugal and were validated by the model developers. Specifically, in the case of Maritime Pine the set of models included PINASTER, (Nunes 2011) and PBIRROL (Alegria and Tomé 2013) as well as the model used for the development of the Leiria National Forest management plan (Garcia-Gonzalo *et al.* 2013). In the case of eucalypt, the set of models comprised GLOBULUS 3 (Tomé *et al.* 2006) and GYMMA (Barreiro *et al.* 2014). In the case of Umbrella pine and chestnut the set of models included, respectively, Pinea (Freire 2009) and Patrício (2006). Finally, in the case of cork oak we used the Suber model (Tomé *et al.* 1998, Almeida 2011 and Paulo 2011).

References:

1. Alegria, C.; Tomé, M. A tree distance-dependent growth and yield model for naturally regenerated pure uneven-aged maritime pine stands in central inland of Portugal. *Ann. For. Sci.* **2013**, *70*,
   261–276.
2. Almeida, A. Desenvolvimento de um sistema para a inicialização do modelo SUBER. Ph.D Thesis, School of Agriculture, Technical University of Lisbon, Lisbon, Portugal, 2011.
3. Barreiro, S.; Tomé, M.; Tomé, J. Modeling Growth of Unknown Age Even-aged Eucalyptus Stands. In: Hasenauer H & Mäkelä A. Modeling forest production. Scientific Tools—Data Needs and sources. Validation and application. In Proceedings of the International IUFRO Congress, Vienna, Austria, 19–22 April 2004; pp. 34–43.
4. Freire, J.P.A. Modelação do crescimento e da produçãode pinha no pinheiro manso. Ph.D. Thesis, School of Agriculture, Technical University of Lisbon, Lisbon, Portugal, 2009.
5. Garcia-Gonzalo, J.; Palma, J.; Freire, J.; Tomé, M.; Mateus, R.; Rodríguez, L.C.E.; Bushenkov, V.; Borges, J.G. A decision support system for a multi stakeholder’s decision process in a Portuguese National Forest. *For. Syst.* **2013**, *22*, 359–373.
6. Nunes, L. Modelo para a predição de indicadores de gestão florestal sustentável em povoamentos de pinheiro bravo em Portugal. Ph.D. Thesis, School of Agriculture, Technical University of Lisbon, Lisbon, Portugal, 2011.
7. Patricio, M.S.F. Análise da Potencialidade Produtiva do Castanheiro em Portugal. Ph.D. Thesis, School of Agriculture, Technical University of Lisbon, Lisbon, Portugal, 2006.
8. Paulo, J.A. Desenvolvimento de um sistema para apoio à gestão sustentável de montados de sobro. Ph.D. Thesis, School of Agriculture, Technical University of Lisbon, Lisbon, Portugal, 2011.
9. Tomé, M.; Coelho, M.B.; Lopes, F.; Pereira, H. *Modelo De Produção Para o Montado De Sobro Em Portugal*; Pereira, H., ed.; Cork Oak and Cork, European conference on Cork-Oak and Cork: Lisboa, Portugal, 1998; pp. 22–46.
10. Tomé, M.; Soares, P.; Oliveira, T. *O Modelo Globulus 3.0. Dados e Equações. Publicações GIMREF RC2/2006*; Universidade Técnica de Lisboa, Instituto Superior de Agronomia, Centro de Estudos Florestais, Lisboa, Portugal, 2006.

**Country:** Slovakia

**Model:** Individual tree model SIBYLA

**Applicability:**

The model SIBYLA is valid for the forested area of the Slovak Republic, mostly Western Carpathians, including both case study areas. Evidence can be checked in Technical University in Zvolen (2014). These links present informations about: (I) the rich empirical base used for construction, parameterisation and validation of the simulator, covering whole the Slovak Republic; and (II) the expected precision of simulator projections when it is used for forest growth and yield simulations in Slovakian natural conditions (tested with Slovak National Forest Inventory plots).

**References:**

1. Technical University in Zvolen. Collection of Electronic Tools of Technical University in
   Zvolen - Sibyla (growth simulator) Web Page, Zvolen Slovakia. Available online: http://etools.
   tuzvo.sk/sibyla/english (accessed on 10 October 2014).

**Country:** Sweden

**Model:** The Heureka DSS system

**Applicability:**

The Heureka system assembles the current state-of-the-art what concerns growth and yield research in Sweden. It is applicable for entire Sweden and has been extensively tested (see below). Today the model is regularly used by Swedish government agencies and enterprises for regional and enterprise level analyses. The system encompasses a range of models that describes, for instance, natural regeneration, validated in Wikberg (2004), natural mortality, validated in Sandström *et al.* (2007), and carbon in litter and humus layer (predicted by the Q-model; see for instance Peltoniemi *et al.* (2004)). The central driver of
the development, and what most other tree and stand variables depend on, is the growth of the tree layer; these functions are based on National Forest Inventory plots and validated in Fahlvik *et al.* (2014).

References:

1. Fahlvik, N.; Elfving, B.; Wikström, P. Evaluation of growth models used in the Swedish forest planning system Heureka. *Silva Fen.* **2014**, *48*.
2. Peltoniemi, M.; Mäkipää, R.; Liski, J.; Tamminen, P. Changes in soil carbon with stand age—An evaluation of a modelling method with empirical data. *Glob. Change Biol.* **2004**, *10*, 2078–2091.
3. Sandström, F.; Petersson, H.; Kruys, N.; Ståhl, G. Biomass conversion factors (density and carbon concentration) by decay classes for dead wood of *Pinus sylvestris*, *Picea abies* and *Betula spp.* in boreal forests of Sweden. *For. Ecol. Manag.* **2007**, *243*, 19–27.
4. Wikberg, P.E. Occurrence, morphology and growth of understorey saplings in Swedish forests/Modelling ingrowth of saplings into the tree layer in Swedish forests. Ph.D. Thesis, Swedish University, Umeå, Sweden, 2004, p. 322.
